# Supplementary material for: An APOBEC/Inflammation-based classifier improves the stratification of multiple myeloma patients and identifies novel risk subgroups
Source: Research Square preprint supplement (doi:10.21203/rs.3.rs-2184702/v1), 2022-10-24

**Appendix- Figure 1. pairwise Pearson’s correlations between all survival-associated parameters.**

**Figure 1A.**


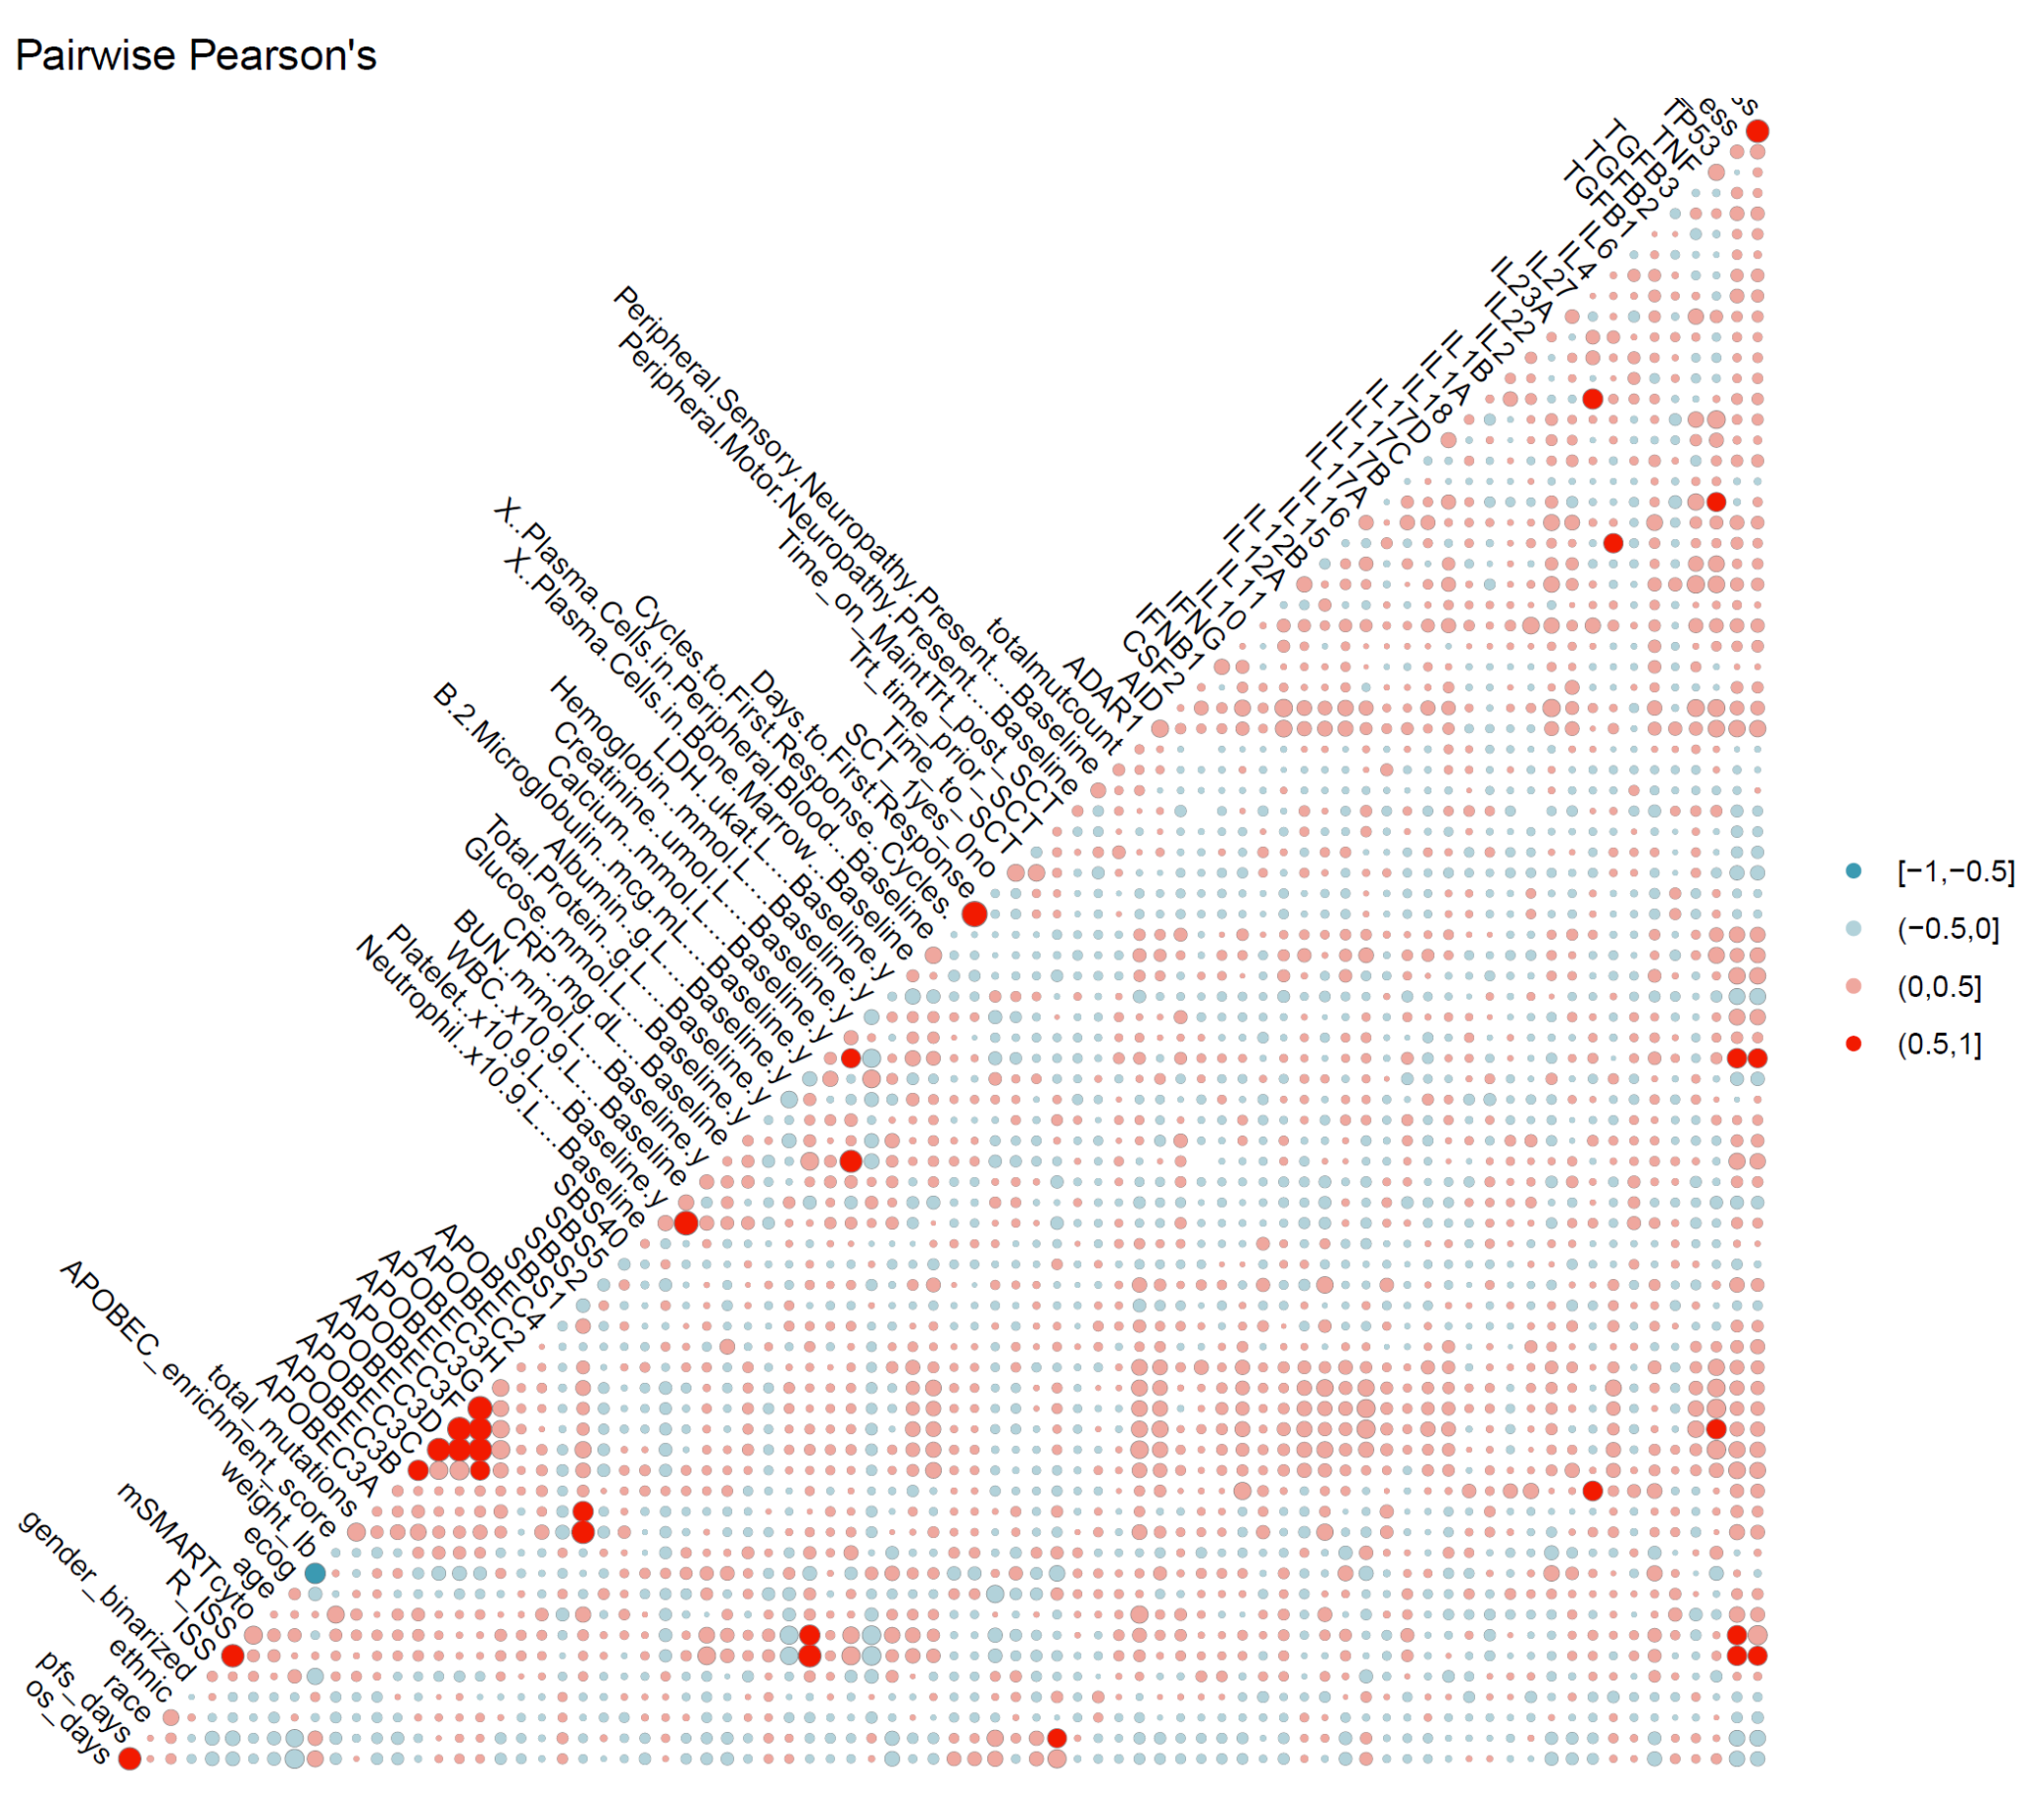


**Figure 1B.**
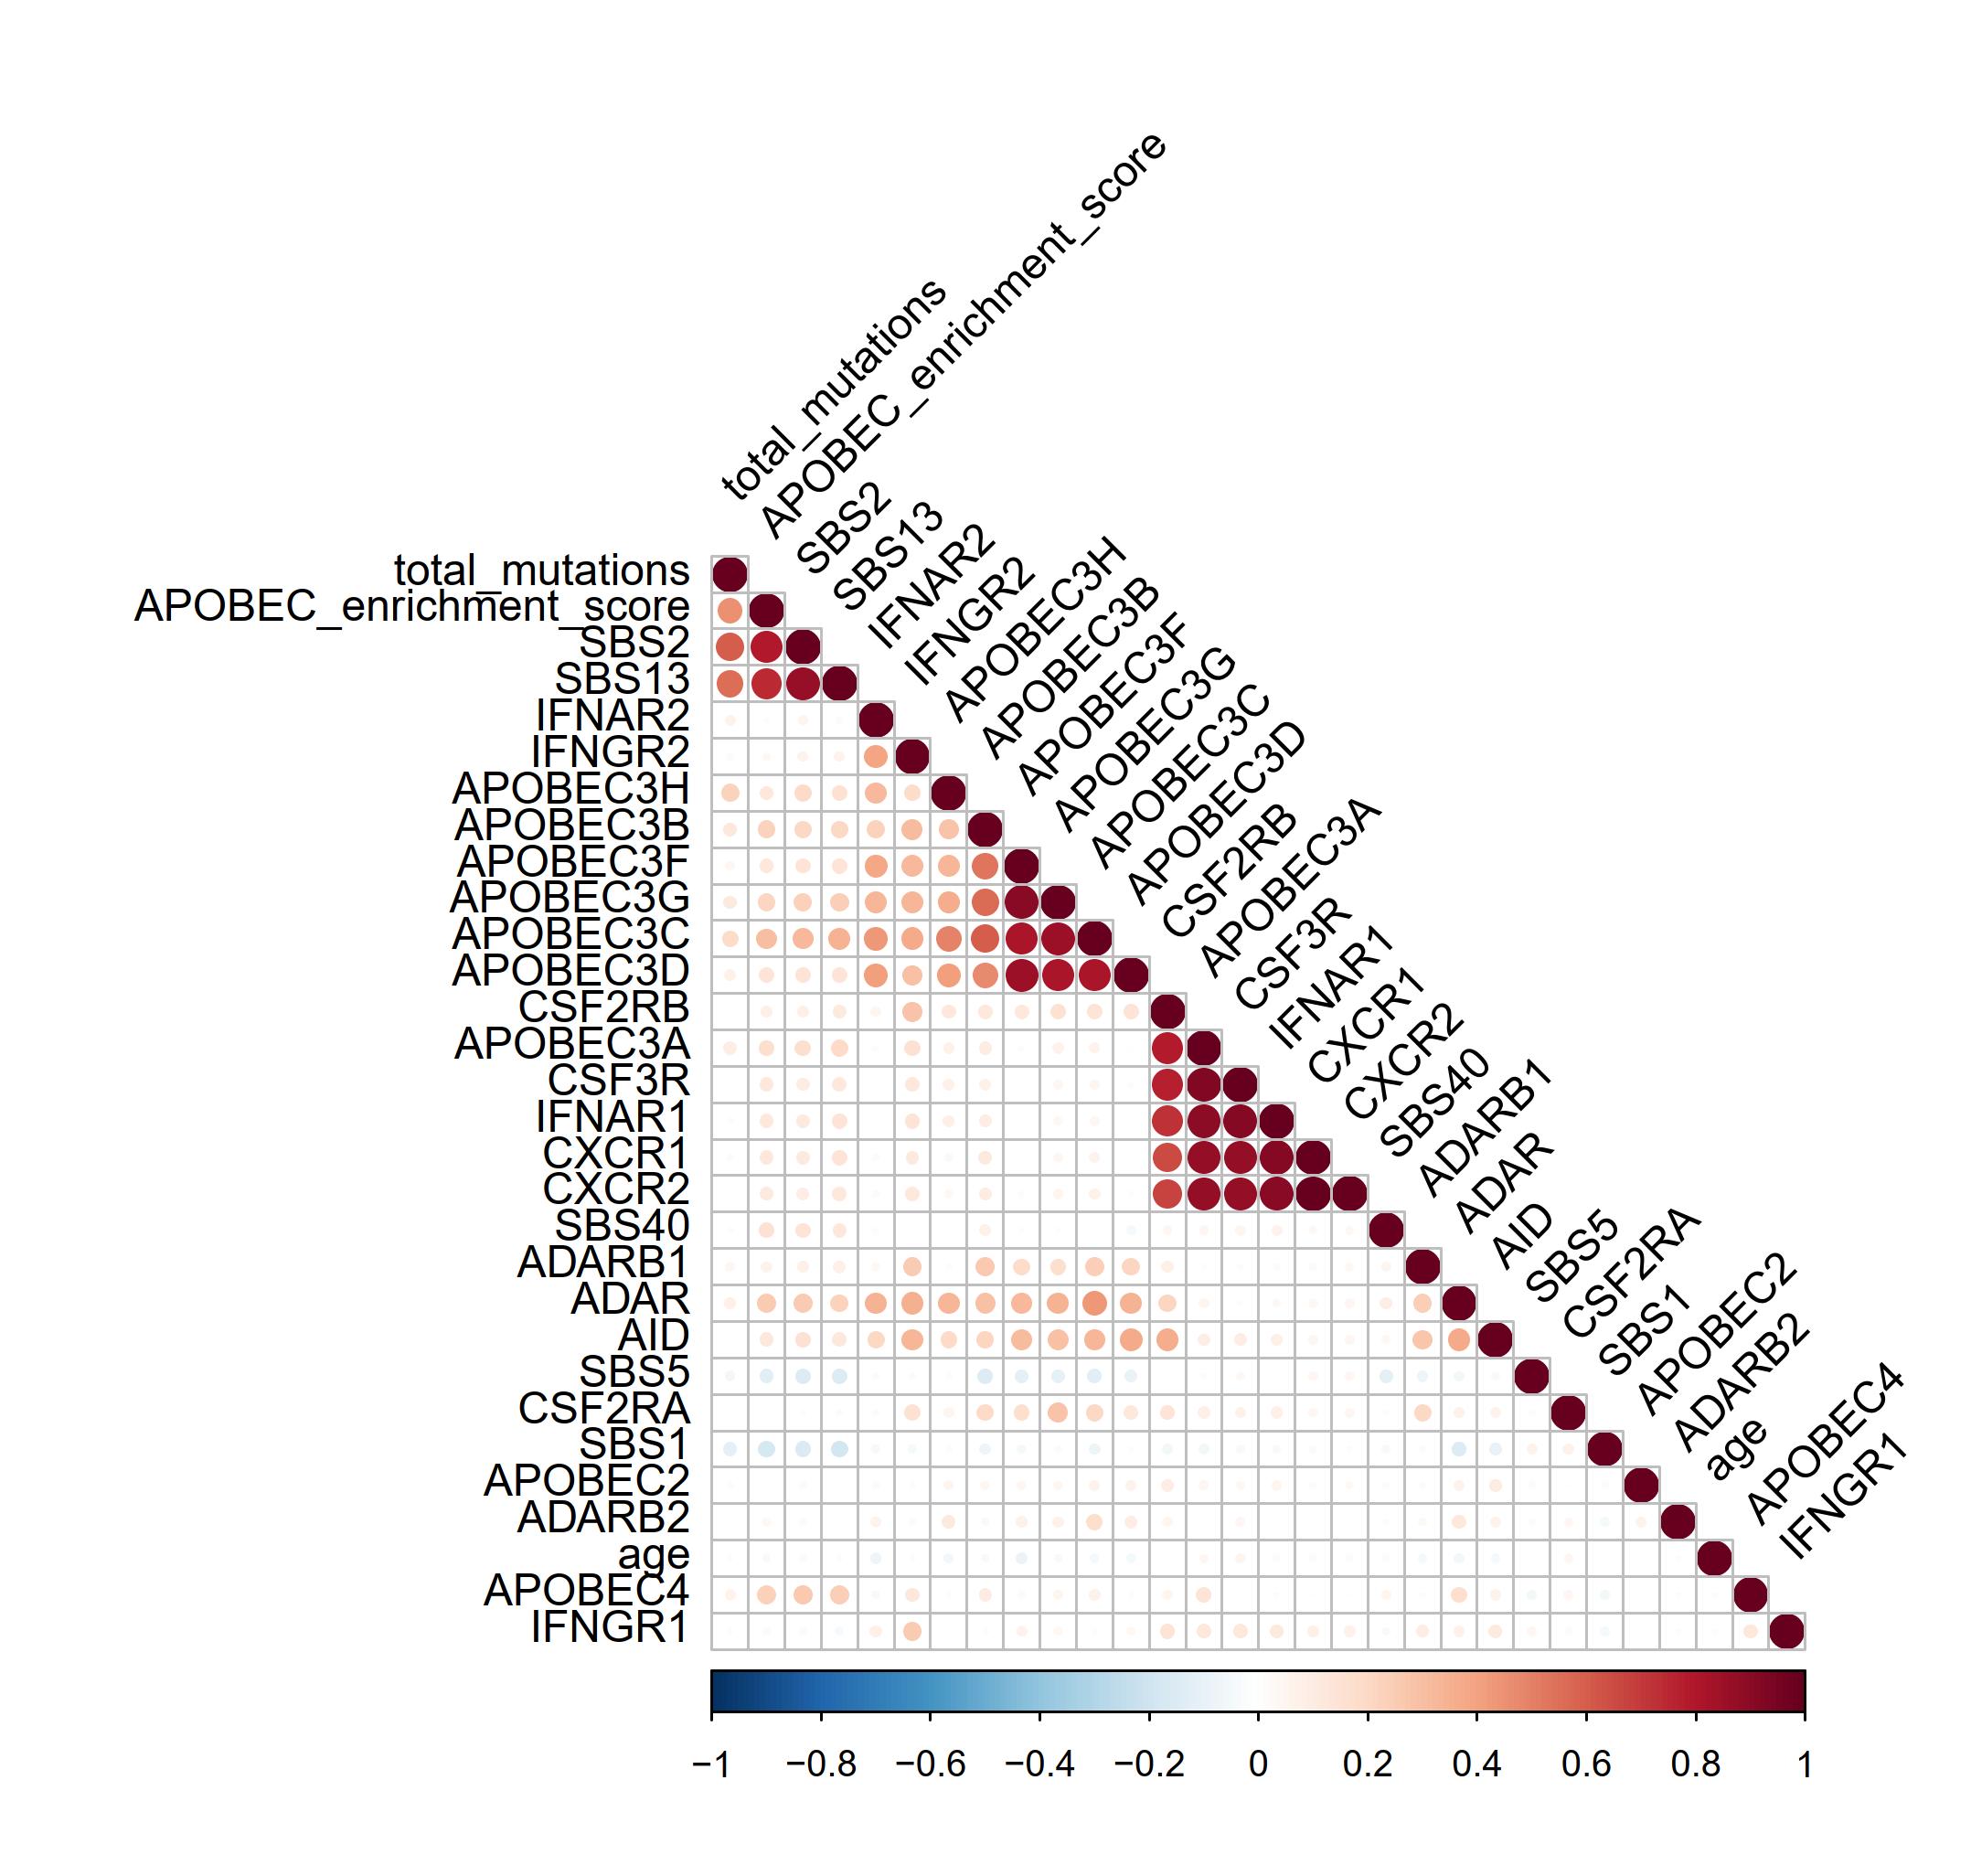

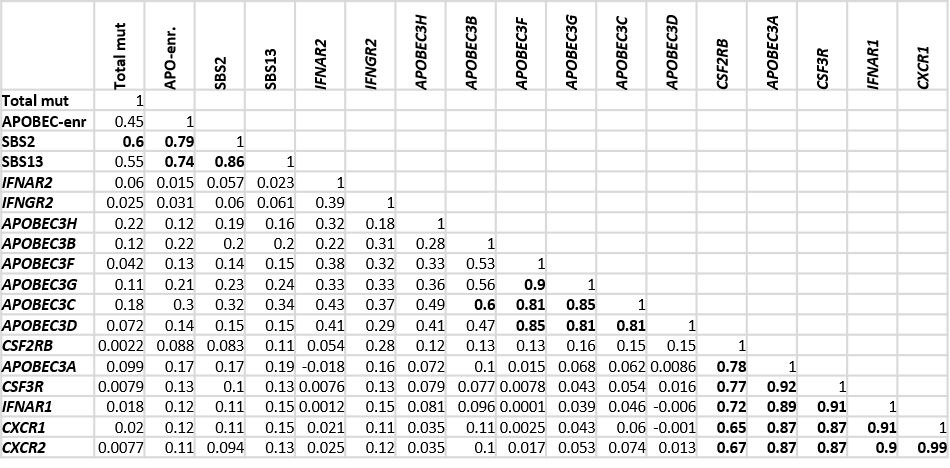

Supplement: Supplementary file 1 [file 0703e9d99efb2db12c6cb0ff.docx]
